# Supplementary material for: Experimental Morogoro Virus Infection in Its Natural Host, Mastomys natalensis
Source: MDPI journal article supplement (doi:10.3390/v13050851), 2021-05-07
Supplement: s1 [file s1]

**Table S1:** Master mix set-up for the qRT-PCR.

| Reagent                                                                                            | Concentration per reaction | Volume per reaction [ $\mu$ l] |
|----------------------------------------------------------------------------------------------------|----------------------------|--------------------------------|
| SuperScript <sup>TM</sup> III Reverse Transcriptase/ Platinum <sup>TM</sup> Taq DNA Polymerase Mix | 0,5 $\mu$ l                | 0,5                            |
| Superscript mix [2x]                                                                               | 1x                         | 12,5                           |
| Probe [10 $\mu$ M]                                                                                 | 0,2 $\mu$ M                | 0,5                            |
| Forward Primer [10 $\mu$ M]                                                                        | 0,5 $\mu$ M                | 1,25                           |
| Reverse Primer [10 $\mu$ M]                                                                        | 0,52 $\mu$ M               | 1,3                            |
| Nuclease-free H <sub>2</sub> O                                                                     |                            | 3,95                           |
| Template                                                                                           |                            | 5                              |
| Total volume                                                                                       |                            | 25                             |

**Table S2.** Cycling parameters for qRT-PCRs with the Platinum<sup>TM</sup> Taq DNA Polymerase Mix.

| Step                  | Temperature [ $^{\circ}$ C] | Time   |
|-----------------------|-----------------------------|--------|
| RT-step               | 55                          | 20 min |
| Polymerase Activation | 95                          | 2 min  |
| Cycling (45x)         | 95                          | 15 sec |
|                       | 55                          | 45 sec |
|                       | 72                          | 15 sec |

**Table S3.** Viral titers in kidney, lung and gonads of infected *M. natalensis* following inoculation or exposure to MORV or MOBV.

| Group                                        | weeks post-birth | kidney     |           |          | lung       |           |          | gonads     |           |          |
|----------------------------------------------|------------------|------------|-----------|----------|------------|-----------|----------|------------|-----------|----------|
|                                              |                  | pos/tested | FFU/organ |          | pos/tested | FFU/organ |          | pos/tested | FFU/organ |          |
|                                              |                  |            | min       | max      |            | min       | max      |            | min       | max      |
| MORV inoculation<br>day 2 ( <i>n</i> = 5)    | 1                | 1/1        | 2,60E+06  |          | 1/1        | 1,15E+08  |          | n.t.       |           |          |
|                                              | 2                | 1/1        | 8,75E+04  |          | 1/1        | 2,14E+05  |          | n.t.       |           |          |
|                                              | 20-22            | 1/3        | 1,35E+04  |          | 2/3        | 7,69E+02  | 2,71E+04 | 2/2        | 1,22E+03  | 1,84E+03 |
| MORV inoculation<br>day 6 ( <i>n</i> = 15)   | 2                | 1/4        | 1,43E+03  |          | 4/4        | 1,25E+03  | 8,00E+04 | 2/4        | 5,00E+02  | 8,75E+02 |
|                                              | 3                | 4/4        | 3,75E+03  | 1,00E+05 | 4/4        | 2,13E+05  | 4,38E+05 | 2/2        | 9,29E+04  | 4,50E+05 |
|                                              | 4                | 3/4        | 2,00E+02  | 2,50E+03 | 3/4        | 2,00E+04  | 6,25E+04 | 1/2        | 3,89E+04  |          |
|                                              | 5                | 1/3        | 2,00E+03  |          | 2/3        | 5,00E+01  | 2,00E+04 | 1/3        | 7,50E+02  |          |
| MORV inoculation<br>day 14 ( <i>n</i> = 7)   | 3                | 2/4        | 1,00E+03  | 7,00E+04 | 1/4        | 4,17E+02  |          | n.t.       |           |          |
|                                              | 4                | 0/3        | negative  |          | 0/3        | negative  |          | 0/3        | negative  |          |
| MORV inoculation<br>day 27 ( <i>n</i> = 4)   | 5                | 0/2        | negative  |          | 0/2        | negative  |          | 0/2        | negative  |          |
|                                              | 8                | 0/2        | negative  |          | 0/2        | negative  |          | 0/1        | negative  |          |
| MORV exposure<br>from birth ( <i>n</i> = 34) | 0-1              | 4/12       | 2,50E+02  | 6,00E+04 | 4/12       | 1,00E+03  | 3,00E+05 | n.t.       |           |          |
|                                              | 2-3              | 1/8        | 1,11E+02  |          | 4/8        | 2,19E+01  | 1,00E+04 | 1/2        | 1,67E+01  |          |
|                                              | 4-5              | 0/4        | negative  |          | 0/4        | negative  |          | 0/4        | negative  |          |
|                                              | 8-10             | 4/5        | 2,09E+04  | 1,98E+05 | 4/5        | 2,62E+03  | 1,28E+05 | 3/4        | 1,08E+03  | 3,39E+04 |
|                                              | 16-20            | 2/5        | 2,41E+03  | 1,48E+04 | 1/5        | 3,75E+04  |          | 2/5        | 2,22E+02  | 1,09E+03 |
| MORV exposure<br>from day 25 ( <i>n</i> = 3) | 8                | 0/3        | negative  |          | 0/3        | negative  |          | 0/3        | negative  |          |
| MOBV inoculation<br>day 2 ( <i>n</i> = 4)    | 1                | 0/1        | negative  |          | 0/1        | negative  |          | n.t.       |           |          |
|                                              | 2                | 1/1        | 9,17E+03  |          | 1/1        | 9,09E+02  |          | n.t.       |           |          |
|                                              | 10               | 0/2        | negative  |          | 0/2        | negative  |          | 0/2        | negative  |          |

n.t. = not tested.

**Table S4.** Viral titers in spleen, liver, heart and brain of infected *M. natalensis* following inoculation or exposure to MORV or MOBV.

| Group                                        | weeks<br>post-birth | spleen     |           |          | liver      |           |          | heart      |           |          | brain      |           |          |
|----------------------------------------------|---------------------|------------|-----------|----------|------------|-----------|----------|------------|-----------|----------|------------|-----------|----------|
|                                              |                     | pos/tested | FFU/organ |          | pos/tested | FFU/organ |          | pos/tested | FFU/organ |          | pos/tested | FFU/organ |          |
|                                              |                     |            | min       | max      |
| MORV inoculation<br>day 2 ( <i>n</i> = 5)    | 1                   | 1/1        | 1,10E+05  |          | 1/1        | 7,92E+03  |          | 1/1        | 7,50E+05  |          | 1/1        | 4,42E+02  |          |
|                                              | 2                   | 1/1        | 2,33E+02  |          | 1/1        | 3,26E+02  |          | 1/1        | 6,43E+04  |          | 1/1        | 4,52E+04  |          |
|                                              | 20-22               | 0/3        | negative  |          | 1/3        | 2,27E+01  |          | 1/3        | 2,08E+02  |          | 1/3        | 4,17E+02  |          |
| MORV inoculation<br>day 6 ( <i>n</i> = 15)   | 2                   | 0/4        | negative  |          | 0/4        | negative  |          | 2/4        | 1,00E+03  | 3,33E+03 | 1/4        | 3,33E+02  |          |
|                                              | 3                   | 4/4        | 1,67E+03  | 2,67E+04 | 0/4        | negative  |          | 4/4        | 2,50E+03  | 9,17E+03 | 4/4        | 1,25E+03  | 3,15E+04 |
|                                              | 4                   | 3/4        | 9,09E+02  | 3,57E+03 | 1/4        | 4,17E+02  |          | 3/4        | 1,11E+03  | 1,00E+04 | 3/4        | 1,39E+02  | 1,18E+03 |
|                                              | 5                   | 1/3        | 1,33E+03  |          | 0/3        | negative  |          | 1/3        | 3,85E+01  |          | 0/3        | negative  |          |
| MORV inoculation<br>day 14 ( <i>n</i> = 7)   | 3                   | 1/4        | 1,67E+04  |          | 1/4        | 2,65E+03  |          | 2/4        | 7,14E+03  | 9,09E+03 | 2/4        | 1,04E+03  | 1,13E+04 |
|                                              | 4                   | 0/3        | negative  |          |
| MORV inoculation<br>day 27 ( <i>n</i> = 4)   | 5                   | 0/2        | negative  |          |
|                                              | 8                   | 0/2        | negative  |          |
| MORV exposure<br>from birth ( <i>n</i> = 34) | 0-1                 | 2/10       | 1,50E+03  | 5,00E+03 | 1/12       | 1,00E+03  |          | 3/8        | 5,00E+02  | 1,00E+04 | 3/10       | 5,00E+01  | 1,11E+03 |
|                                              | 2-3                 | 2/8        | 4,17E+01  | 6,25E+01 | 1/8        | 6,25E+01  |          | 0/8        | negative  |          | 3/8        | 1,67E+01  | 5,00E+03 |
|                                              | 4-5                 | 0/4        | negative  |          |
|                                              | 8-10                | 3/5        | 3,70E+02  | 6,16E+04 | 3/5        | 4,81E+02  | 2,44E+03 | 3/3        | 1,07E+03  | 2,63E+03 | 4/5        | 1,68E+03  | 3,55E+04 |
|                                              | 16-20               | 2/5        | 1,39E+02  | 6,00E+03 | 1/5        | 6,82E+03  |          | 1/5        | 3,67E+03  |          | 1/5        | 9,26E+02  |          |
| MORV exposure<br>from day 25 ( <i>n</i> = 3) | 8                   | 0/3        | negative  |          | 0/3        | negative  |          | n.t.       |           |          | 0/3        | negative  |          |
|                                              |                     |            |           |          |            |           |          |            |           |          |            |           |          |
| MOBV<br>inoculation<br>day 2 ( <i>n</i> = 4) | 1                   | 0/1        | negative  |          |
|                                              | 2                   | 0/1        | negative  |          | 0/1        | negative  |          | 1/1        | 1,50E+05  |          | 1/1        | 3,70E+04  |          |
|                                              | 10                  | 0/2        | negative  |          | 0/2        | negative  |          | n.t.       |           |          | 0/2        | negative  |          |

n.t. = not tested.

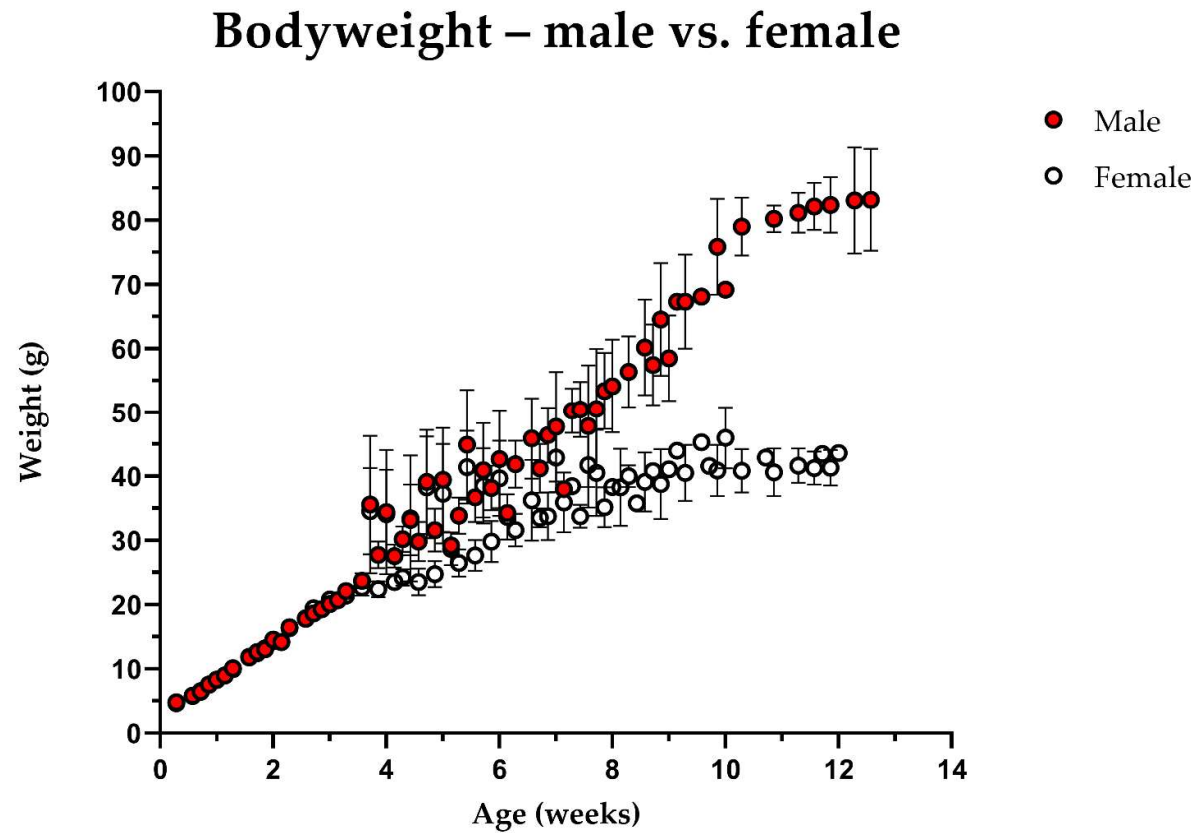

**Figure S1.** Growth of male and female *Mastomys*. The body weight of *M. natalensis* ( $n = 51$ ) during the first 14 weeks of life is shown as mean with standard deviation. Males ( $n = 26$ ) are depicted as red dots and females ( $n = 25$ ) as white dots.
